# Supplementary material
Source: MDPI journal article supplement (https://www.mdpi.com/2226-471X/9/3/85)
Supplement: s1 [file s1]

## Supplementary material

### *Alfa, transcription of truthful account*

&-eh ja (.) &-eh (.) &-eh de [: det] är då ett trädgårdskafe (.) &-eh och &-eh (.) &-eh de [: det] sitter en tjej på (.) en stol och läser en tidning å [: och] har sin väska bredvid sig (.) &-eh till en början (.) så är de [: det] bara hon där men sen kommer de [: det] en till tjej som tittar på (.) &-eh vad som finns på kafet på dom [: de] borden funderar på va [: vad] hon vill ha (.) &-eh när hon har bestämt sig så går hon och &-eh betalar (.) &-eh å [: och] då kommer även en man in (.) &-eh ganska (.) &-eh raskt och välter ner (.) &-eh den hära [: här] tjejen som satt på en stol hennes väska &-eh välter omkull den så den hamnar på marken (.) &-eh han märker in de [: det] utan han går fram och börjar (.) titta vad som finns (.) bland &-eh bakverken å [: och] så (.) &-eh och &-eh den hära [: här] tjejen då får [//] &-eh börjar plocka ihop sin väska &-eh (.) och &-eh sätter sig igen (.) &-eh den hära [: här] mannen då han börjar plocka i ordning va [: vad] han vill ha (.) &-eh och &-eh (.) &-eh den hära [: här] tjejen då (.) som hennes väska trillade ner hon [//] &-eh när mannen är och &-eh plockar på ett annat bord så går hon fram å [: och] håller ner peppar <i hans> [/] &-eh i hans mugg &-eh där han har nån form av dricka i (.) &-eh å [: och] sen går hon snabbt därifrån (.) &-eh och den hära [: här] andra (.) &-eh tjejen som (.) &-eh va [: var] där sen innan hon sitter bara å [: och] tittar på (.) och mannen går och tar sina saker som han har (.) &-eh köpt å [: och] sen går han å [: och] sätter sig och &-eh är själv kvar i kafet och dricker ur den här muggen och spottar ut &-eh å [: och] blir jätteförvånad å [: och] tittar sig omkring och försöker (.) &-eh fundera ut vem [//] å [: och] vem eller <hur han> [//] hur de [: det] kunde smaka så äckligt (.) ja klar

### *Alfa, transcription of deceitful account*

&-eh (.) ja &-eh (.) de [: det] är då en &-eh tentasal (.) de [: det] är ett ganska litet klassrum (.) några bänkar och (.) de [: det] sitter en tentavakt som sitter längst fram i salen (.) &-eh och sen har vi två stycken personer som skriver tenta då (.) &-eh en sitter till [//] lite mer till vänster å [: och] en sitter lite mer till höger (.) &-eh (.) och &-eh när tentan är igång så (.) &-eh går tentavakten upp (.) &-eh från sin stol längst fram å [: och] går fram å [: och] (.) bevakar lite &-eh han har med sig sin termos (.) &-eh å [: och] tittar så att allting går rätt till &-eh sen går han tillbaka till sin plats och sätter sig ner <vid sitt> [//] vid bordet igen när han sätter sig ner så <välter han ut> [//] (.) eller råkar han välta ut sin termos på golvet &-eh och de [: det] kommer då kaffe på golvet som han måste börja torka upp (.) &-eh dom [: de] här personerna som skriver tentan då &-eh märker detta och &-eh (.) &-eh personen till vänster &-eh (.) &-eh (.) tar fram en fuskklapp ur fickan (.) och &-eh (.) försöker lite diskret att skicka över den till &-eh personen till höger (.) &-eh (.) den här personen till höger vill [//] försöker säga nej å [: och] vill inte ta emot lappen men tar till slut emot den &-eh och &-eh <tanken är att> [//] (.) eller hon [//] man ser att hon försöker &-eh (.) lämna tillbaka den men &-eh hon hinner inte för tentavakten &-eh har precis torkat klart [!] på golvet å [: och] sitter igen i sin stol &-eh sen är tentan slut och båda två går å [: och] lämnar in tentan (.) &-eh när [/] &-eh (.) när dom [: de] har lämnat in å [: och] lämnat salen och tentavakten börjar packa ihop sina saker så (.) &-eh ser man att de [: det] ligger en skrynklig lapp på golvet (.) och han plockar upp den å [: och] upptäcker att de [: det] är en fuskklapp (.) klar

### *Bravo, final text of truthful account*

Det var en molning sommardag i juni när jag kom fram till trädgårdscafét. Två bord stod uppdukade med kaffe, saft och kakor. Det var ingen som stod och sålde utan istället fick man ta själv och sedan swisha via en QR-kod. Det var några bord uppställda bakom kaffeborden där man kunde sitta och avnjuta sitt fika. Vid ett bord satt en tjej och åt sin tårta. Efter ett tag kom en ung tjej som swishade numret och började hålla upp sitt kaffe. Samtidigt som detta hände kom plötsligt en man som gick rakt in i tjejen som satt och åt sin tårta. Han välte hennes väska och alla hennes grejer åkte ur. Istället för att säga förlåt fortsatte han att gå till kaffebordet och trängde sig framför den unga tjejen och tog kaffet före henne. Tjejen vars väska välte ur blev irriterad och suckade högt samtidigt som hon plockade upp sina saker. Killen gick vidare till fikabordet och valde vilket bakverk han skulle ha. När tjejen hade plockat ihop alla sina saker gick hon fram till kaffebordet och tog upp en pepparkvarn och

hällde peppar i mannens kaffe. Efter det gick ut därifrån. Den yngre tjejen såg detta och gick snabbt iväg från cafét. Mannen såg ingenting av detta och tog sitt kaffe och satte sig vid ett bord. Han tog en sip av sitt kaffe men spottade ut allting när han märkte att det var peppar i kaffet.

*Bravo, linear text of truthful account (pause=1000 ms)*

<META totalRecTime=372.356 /META><START><9.412>DET V<BACKSPACE4>e <BACKSPACE1>t var en molning <2.229>sommardag i juni när jag kom fram till trädgårdscafét. Vid ett <1.572><BACKSPACE8>D<BACKSPACE1>Två bord stod uppdo<BACKSPACE1>ukade med <1.225>kaffe, saft och kakor. <1.296>Det var ingen <2.469>som stod och sålde utan istället fanns <BACKSPACE6>var det självbe<2.086>tä<1.249><BACKSPACE2>jätning <3.719><MOUSECLICK><HIGHLIGHT 194:180><MOUSECLICK><BACKSPACE9>fick man ta själv och sedan swisha via en qu<BACKSPACE2>r-kod<1.324><BACKSPACE6>QE<BACKSPACE1>R-kod. <3.476>Det var några bord uppställda bakom <2.725>kaffeborden n<BACKSPACE1>där man kunde sitta <1.233>och avnjuta sitt fika. Vid ett bord satt en tjej och fikade <BACKSPACE7>åt sin tårta. <2.488>Efter ett ag <BACKSPACE3>tag kom en ung flicka som<BACKSPACE2>m <BACKSPACE10>tjej som <6.639>swishade numret och började <2.623>hälla upp kaff<BACKSPACE4>sitt kaffe. Samtidigt som detta hände <1.490><BACKSPACE2>e <3.053>kom <1.393>plötsligt en man som <BACKSPACE4>som gick rakt in i tjejen som satt och åt sin tårta. Han välde <BACKSPACE3>te hennes väska och alla hennes <BACKSPACE4>nes grejer åkte ur. <2.809>Istället för att säga förlåt för<BACKSPACE2>ortsatte han att gå <2.183>till akf<BACKSPACE3>kaffebordet och r<BACKSPACE1>trängde sig framför den unga <1.388>tjejen och tog kaffet förre<BACKSPACE2>e henne. <1.575>D<BACKSPACE1>Tjejen med<BACKSPACE3>som<BACKSPACE3>vars väska <1.754>välte ut <BACKSPACE2>r blo<BACKSPACE1>ev irriterad och <1.445>suckade högt. <1.544><BACKSPACE2>samtigit <BACKSPACE4>dgt <BACKSPACE3>igt som hon plockade upp sina saker. <4.043>Killen gick vidare till fikabordet och <4.081>valde vilket bakverk han skulle han<BACKSPACE1>. <3.250>När kille<BACKSPACE10>J<BACKSPACE1>Tjejen <1.471><BACKSPACE7>När tjejen hade plockat ihp<BACKSPACE1>op alla sina saker gick hon fram till kaffebordet och <1.287>tog upp en pepparkvarn som hon <3.799>använde<BACKSPACE15>och <1.993>hällde peppar i mannens kaffe. Den lilla tj<BACKSPACE8>yngre tjejen <1.372>såg detta och gick <4.163>snabbt igäv<BACKSPACE3>väg från k<BACKSPACE1>cafét, <BACKSPACE2>vilket <2.792><BACKSPACE8>. <1.505><MOUSECLICK><2.931>Efter det gick ut därifrån och <BACKSPACE5>. <1.330>Manenn <BACKSPACE4>nen val<BACKSPACE11>Mannen såg ingenting av detta och tog sitt kaffe och <BACKSPACE4><1.480>och satte sig vid ett bord. Han <2.489>te<BACKSPACE6>Han <1.278>tesa<BACKSPACE4>tog en sip av sitt kaffe men sopo<BACKSPACE3>pottade ut allting när han märkte att det var peppar i kaffet.

*Bravo, final text of deceitful account*

Jag sitter i tentasalen tillsammans med två andra studenter. Längst fram i rummet sitter en tentavakt och dricker sitt kaffe. De två studenterna är två tjejer i 20-års åldern. Den ena tjejen har gul tröja och uppsatt hår medan den andra tjejen har utsläppt hår och svart tröja. Tiden går men efter ett tag ställer sig tentavakten upp och börjar vandra runt i klassrummet och inspekterar studenterna. Han går sedan tillbaka till sitt bord men när han sätter sig ner råkar han spilla ut kaffet. Han tar snabbt upp servetter och böjer sig ner på golvet för att börja torka. Samtidigt som han har ryggen vänd mot studenterna tar tjejen med gul tröja upp en lapp ur sin ficka. Hon vecklar snabbt ut lappen och läser kort innan hon knögglar ihop den igen. När tentavakten vänder sig om igen är lappen borta och tjejerna fortsätter att skriva. Efter ytterligare några minuter säger tentavakten att tiden är ute och tjejerna plockar ihop sina saker och lämnar in tentan. När tjejen i gul tröja plockar ihop sina saker råkar hennes fuskklapp trilla ner på golvet, men utan att hon märker det. Tjejerna lämnar sedan lokalen och precis när tentavakten också ska gå tittar han ner vid tjejens plats och upptäcker lappen.

*Bravo, linear text of deceitful account (pause=1000 ms)*

<META totalRecTime=280.261 /META><START><10.812>JAG SI<BACKSPACE5>ag sitter i tentasalen tillsammans med två andra studenter. <3.364>Längst fram i klas<1.111><BACKSPACE4>rummet sitter <3.004>en tn<BACKSPACE2>tentavakt <1.456>och dricker sitt kaffe. Tentavakten är en ung kille <3.703>som <2.088><BACKSPACE32><4.815>De två studenterna är två tjejer <3.811>i <1.172>20-  
rs<BACKSPACE2>års åldern. Den ena tjejen har <1.068>gul träja <BACKSPACE4>öja och uppsatt hår medan den andra tjejen har utsläppt hår och <2.858>svart tröja. <2.337>Tiden går <2.380>men efter ett tag ställer sig tentavakten upp och börjar vandra runt i klassrummet för <BACKSPACE4>och inspekterar studenterna. <2.208>När <BACKSPACE4>Han går sedan tillbaka till sin <1.378><BACKSPACE2>tt bort <BACKSPACE2>d och när han sä<BACKSPACE14>men när han sätter sig ner <1.357>råkar han spilla ut kaffet. <1.623>Han tar snabbt upp ser<2.594>vetter och böjer sig ner på golvet för att börja r<BACKSPACE1>torka. Samtidigt som <1.302>han <2.292>har ryggen vänd mod <BACKSPACE2>t std<BACKSPACE1>udenterna tar tjejen med gul tröa<BACKSPACE1>ja upp en lapp ur sin ficka. Hon <3.466>vecklar snabbt ut lappen och <1.779>läser <1.196>kort innan hon knäggjar <BACKSPACE7>öggjar ihop den igen. <2.812>När <2.079>tentavakten vänder sig om igen är lappen borta och flick<BACKSPACE5>tjejerna fortsätter att skriva. <1.427>Efter ytterlia<BACKSPACE1>gare några minuter <1.213>säger tentavakten att tiden är ute och tjejerna <1.131>plockar ihop sina saker och lämnar in tentan. När jt<BACKSPACE2>tjejen i gul tröja plockar ihop sina saker råkas <BACKSPACE2>r hennes fusklapp trilla ner på golvet, men utan att hon märker det. <1.583>Tjejerna lämnar sedan lokalen och precis när tentaa<BACKSPACE1>vakten också ska gå n<BACKSPACE1>mä<BACKSPACE2>tittar han ner vid <1.727>tjejens plats oc <BACKSPACE1>h upptäcker lappen.
